# Supplementary material for: Reuse of Immobilized Weissella cibaria PN3 for Long-Term Production of Both Extracellular and Cell-Bound Glycolipid Biosurfactants
Source: PubMed Central journal article supplement (PMC7347796; doi:10.3389/fbioe.2020.00751), 2020-07-03
Supplement: Data_Sheet_1.pdf [file Data_Sheet_1.pdf]

## Supplementary Material

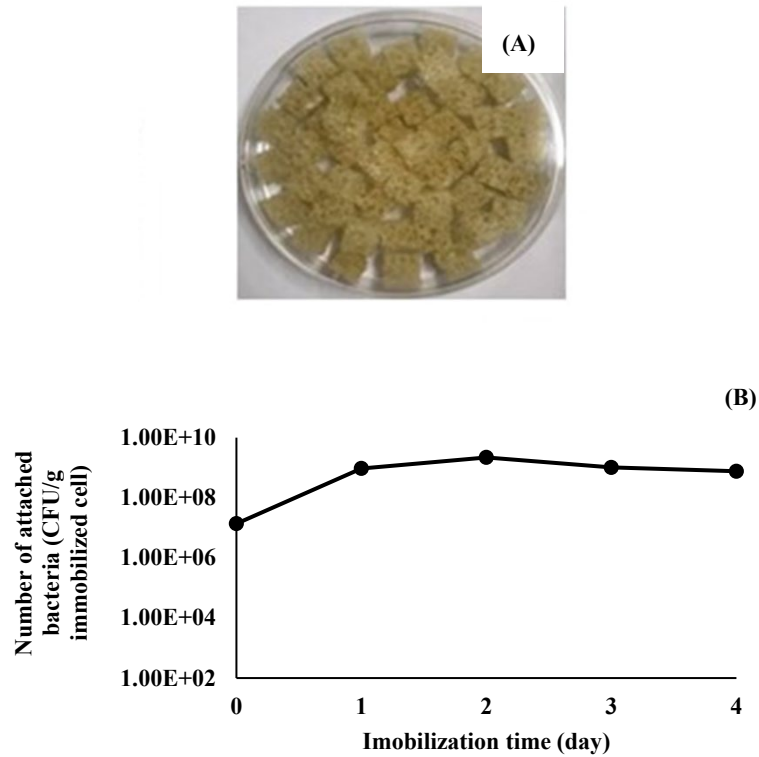

**Supplementary Figure 1.** The characteristics of aquaporousgel after biosurfactant production (A). The numbers of attached bacteria during cell immobilization were monitored (B).

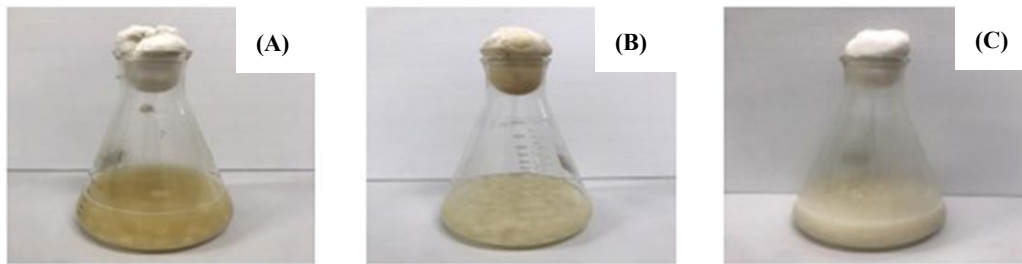

**Supplementary Figure 2.** Immobilized *Weissella cibaria* PN3 in LB broth during immobilization process (A) and in basal medium supplemented with 2% (v/v) soybean oil before (B) and after biosurfactant production (C).

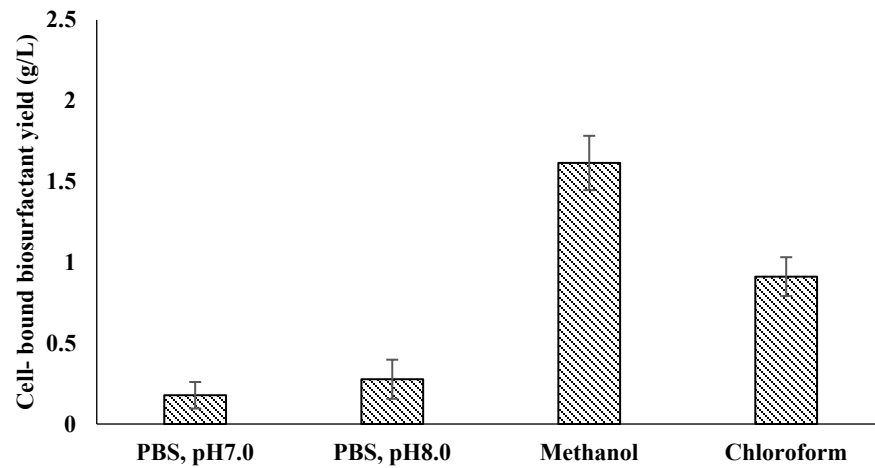

**Supplementary Figure 3.** The yields of cell-bound biosurfactant after resuspending the cell pellets in PBS, methanol and chloroform.

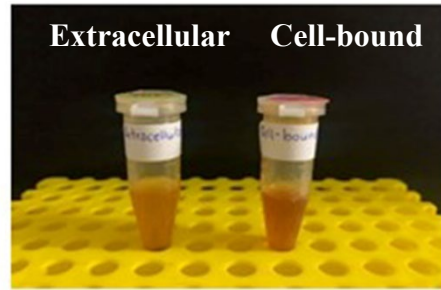

**Supplementary Figure 4.** Crude extracellular and cell-bound biosurfactant from immobilized-*Weissella cibaria* PN3

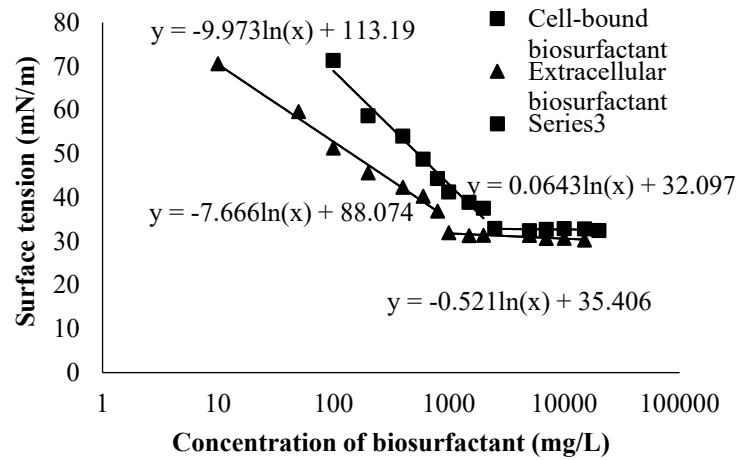

**Supplementary Figure 5.** Evaluation of critical micelle concentration (CMC) of crude extracellular and cell-bound biosurfactants.

**Supplementary Table1.** Surface tension of crude extracellular and cell-bound biosurfactants at the CMC value.

| Biosurfactant types         | Equation                       | Surface tension | Average surface tension (mN/m) |
|-----------------------------|--------------------------------|-----------------|--------------------------------|
| Extracellular biosurfactant | $Y = -7.621\ln(x) + 87.970$    | 31.32           | 31.32±0.08                     |
|                             | $Y = -7.710\ln(x) + 88.179$    | 31.41           |                                |
|                             | $Y = -7.66\ln(x) + 88.065$     | 31.25           |                                |
| Cell-bound biosurfactant    | $Y = -9.983\ln(x) + 112.992$   | 32.58           | 32.59±0.03                     |
|                             | $Y = -9.973\ln(x) + 113.194$   | 32.62           |                                |
|                             | $Y = -9.965 \ln (x) + 112.890$ | 32.56           |                                |

\*Surface tension of PBS was 68.32±0.25 mN/m

(A)

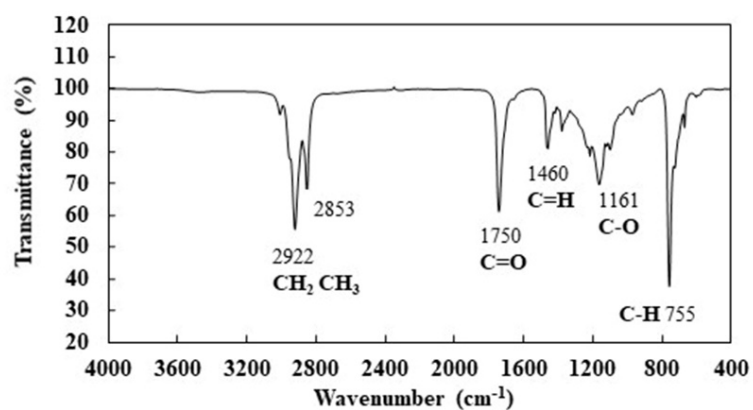

(B)

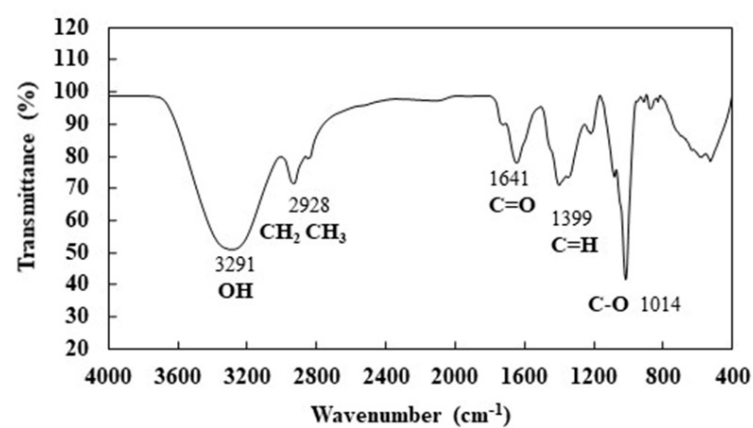

**Supplementary Figure 6.** FTIR spectrum of crude extracellular (a) and cell-bound biosurfactant (b) from *Weissella cibaria* PN3.
